# Supplementary material for: Latex particle template lift-up guided gold wire-networks via evaporation lithography
Source: Royal Society of Chemistry journal article supplement (doi:10.1039/c4ra11278d), 2014-01-01
Supplement: c4ra11278d1.pdf [file c4ra11278d1.pdf]

## Supporting Information

### Latex Particle Template Lift-up Guided Gold Wire-Networks Via Evaporation Lithography

Saifullah Lone,<sup>1\*</sup> Ivan U. Vakarelski,<sup>1</sup> Basil Chew,<sup>2</sup> Zhihong Wang<sup>2</sup> and Sigurdur T. Thoroddsen<sup>1</sup>

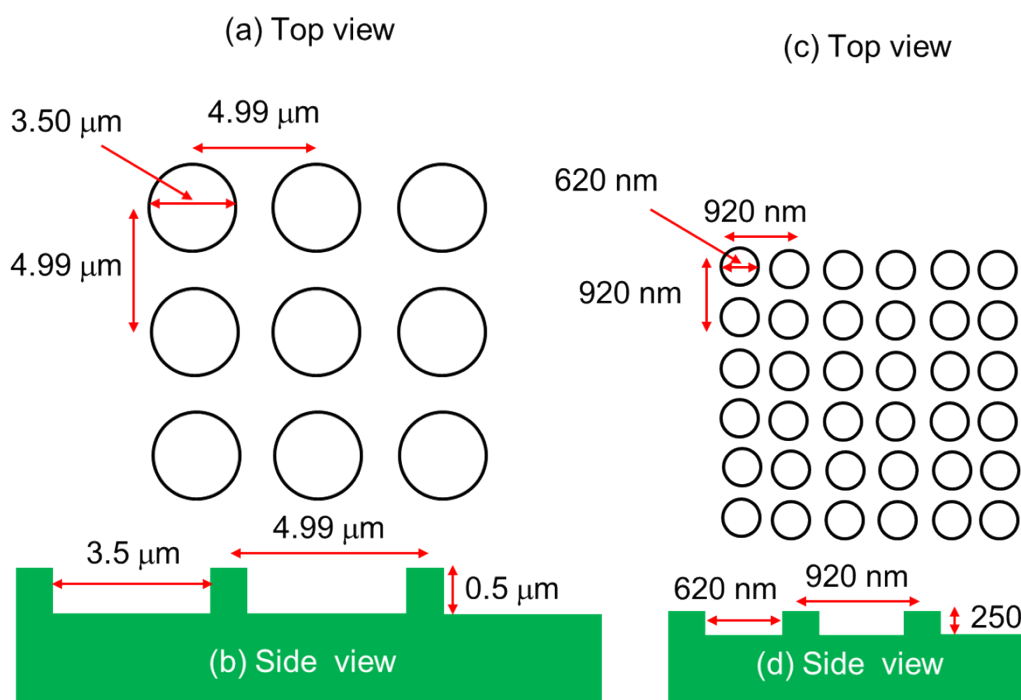

Figure S1. Schematic illustration (top and side views) of the dimensions of micro- (ab) and nanowells (cd) on patterned silicon wafer used for the dry deposition of 5  $\mu\text{m}$  and 1  $\mu\text{m}$  sized latex particles.

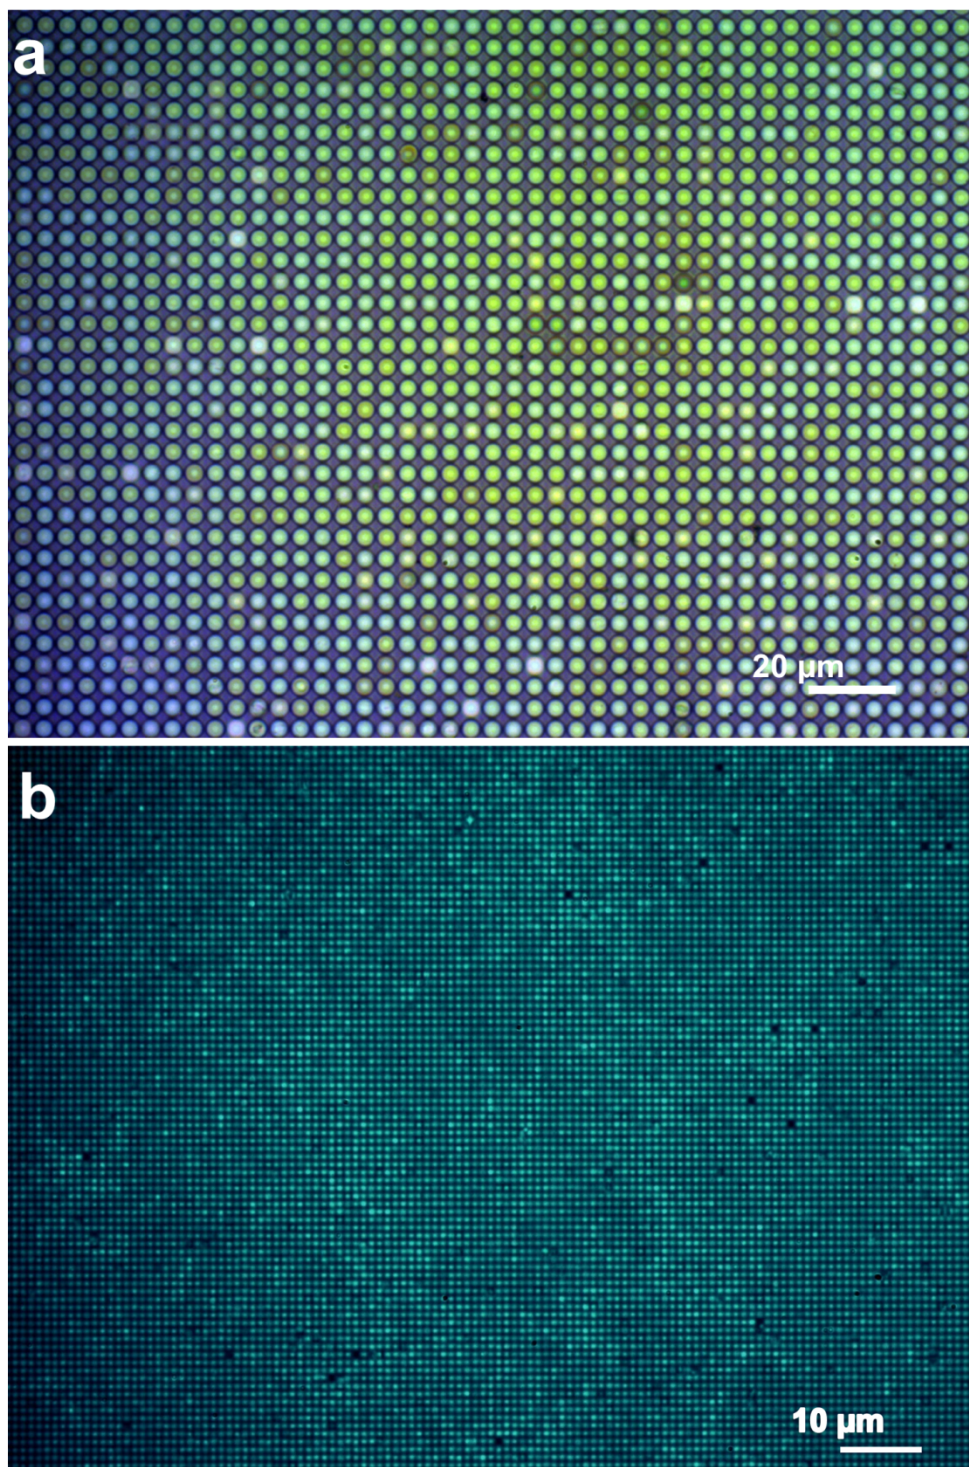

Figure S2. Large area dry deposition of 2D monolayer of latex particles onto a patterned silicon wafer in a square array arrangement for, (a) 5  $\mu\text{m}$  and (b) 1  $\mu\text{m}$  sized latex particles.



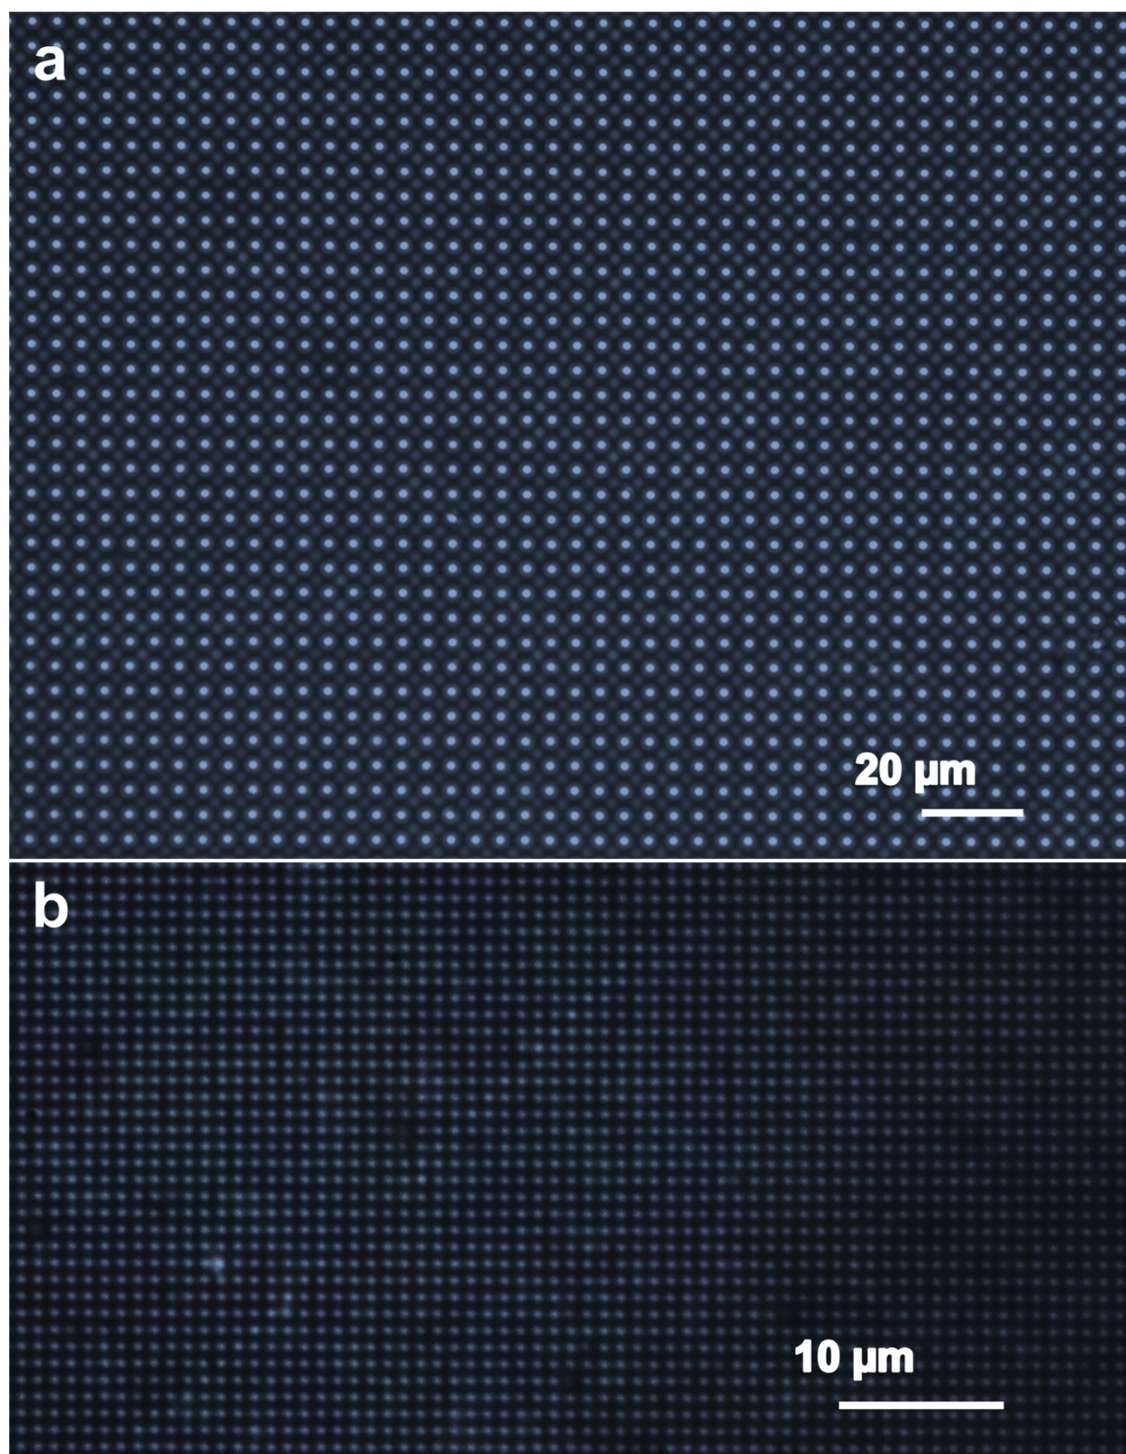

Figure S3. Large area latex particle lift-up of a 2D monolayer of latex particles on a glass substrate, (a) 5 μm and (b) 1 μm sized latex particles.

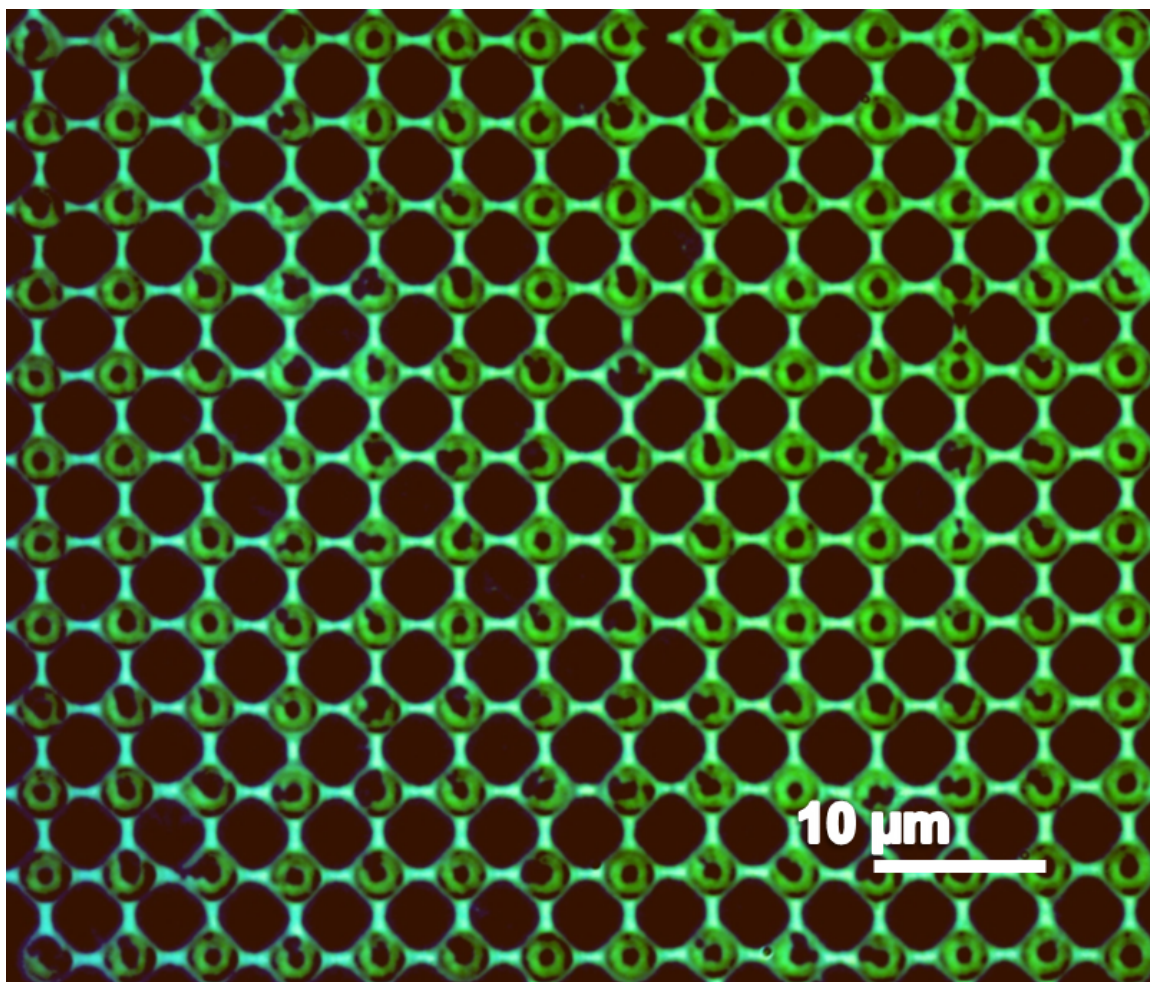

Figure S4. Optical micrograph of gold microwire network fabricated at room temperature (25 C).



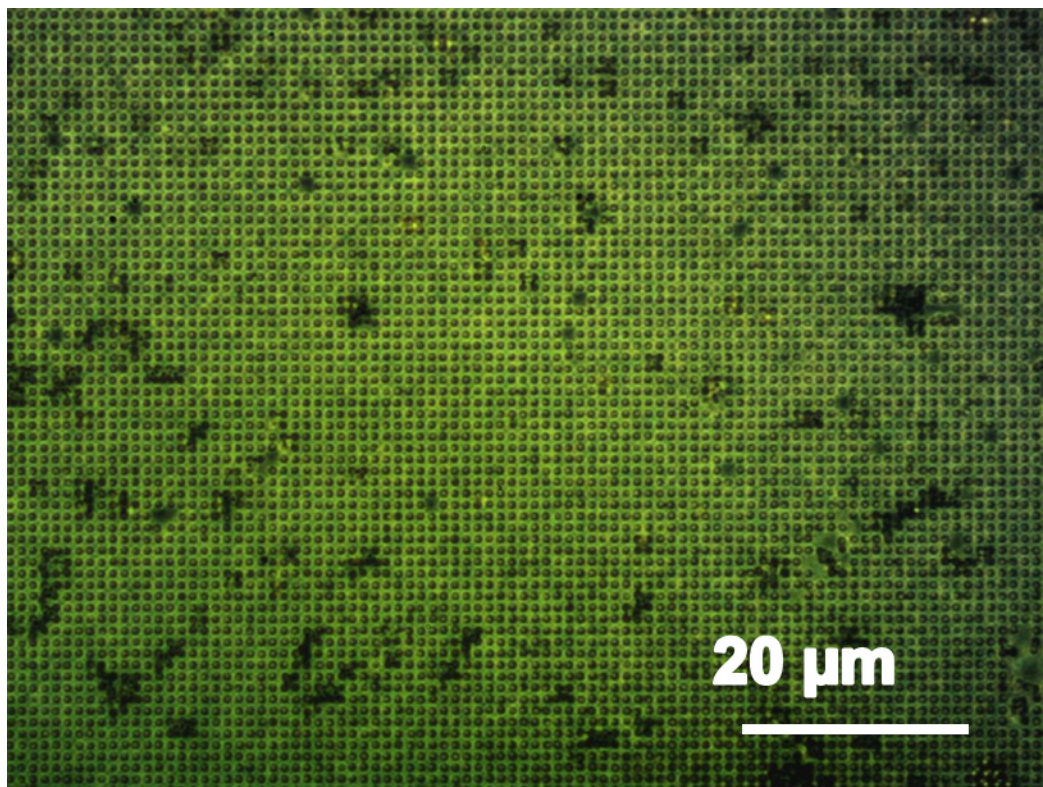

Figure S5. Optical image of gold nano-pattern fabricated from evaporation lithography by exploiting 1 $\mu$ m size latex particles. The dark patches represent the leftover debris of latex particles after oxygen plasma treatment.
